# Supplementary material for: Autonomic dysfunction after moderate-to-severe traumatic brain injury: symptom spectrum and clinical testing outcomes
Source: HighWire-hosted journal article supplement (doi:10.1136/bmjno-2022-000308), 2022-04-01
Supplement: bmjno-2022-000308supp001_data_supplement.pdf [file bmjno-2022-000308supp001_data_supplement.pdf]

**TABLE 1: Clinical characteristics of recruited participants**

| <b>(A) Prospective Symptom Assessment Cohort – TBI patients</b> |            |                                |                                   |                            |                                                                                                               |
|-----------------------------------------------------------------|------------|--------------------------------|-----------------------------------|----------------------------|---------------------------------------------------------------------------------------------------------------|
| <b>ID</b>                                                       | <b>Sex</b> | <b>Age range at assessment</b> | <b>Time since injury (months)</b> | <b>Mechanism of injury</b> | <b>Medications</b>                                                                                            |
| P1*                                                             | M          | 30-39                          | 7                                 | Fall/Assault               | <i>nil</i>                                                                                                    |
| P2*                                                             | F          | 17-19                          | 8                                 | Fall                       | Vit D                                                                                                         |
| P3                                                              | M          | 20-29                          | 7                                 | RTA                        | Vit D, Vit B12                                                                                                |
| P4*                                                             | M          | 20-29                          | 8                                 | Fall                       | Propranolol, terbinafine, sumatriptan PRN, Vit D                                                              |
| P5                                                              | M          | 20-29                          | 20                                | RTA                        | Salbutamol INH, citalopram, codyramol PRN                                                                     |
| P6                                                              | M          | 20-29                          | 20                                | Assault                    | Vit D                                                                                                         |
| P7                                                              | M          | 40-49                          | 19                                | RTA                        | <i>nil</i>                                                                                                    |
| P8                                                              | F          | 40-49                          | 13                                | Fall                       | Sertraline                                                                                                    |
| P9                                                              | M          | 40-49                          | 27                                | RTA                        | Citalopram, Vit D                                                                                             |
| P10                                                             | M          | 40-49                          | 22                                | Fall                       | <i>Nil</i>                                                                                                    |
| P11                                                             | M          | 40-49                          | 23                                | Fall                       | Clonazepam, esomeprazole, lactulose PRN, paracetamol                                                          |
| P12                                                             | M          | 20-29                          | 12                                | <i>nk</i>                  | <i>nil</i>                                                                                                    |
| P13                                                             | M          | 20-29                          | 37                                | Sport                      | Paracetamol                                                                                                   |
| P14*                                                            | M          | 40-49                          | 6                                 | Seizure                    | Lamotrigine, folate, thiamine, Vit B12, paracetamol, codeine PRN, sertraline                                  |
| P15*                                                            | F          | 40-49                          | 6                                 | RTA                        | <i>nil</i>                                                                                                    |
| P16                                                             | M          | 20-29                          | 7                                 | Fall                       | Dihydrocodeine PRN                                                                                            |
| P17*                                                            | M          | 50-59                          | 6                                 | Object                     | Ondansetron, paracetamol                                                                                      |
| P18                                                             | F          | 30-39                          | 21                                | RTA                        | Thyroxine                                                                                                     |
| P19*                                                            | F          | 70-79                          | 72                                | RTA                        | Sertraline, atorvastatin, melatonin, omeprazole, oxybutynin, Adcal D3, trimethoprim, paracetamol, cinnarizine |
| P20                                                             | F          | 40-49                          | 25                                | RTA                        | <i>nil</i>                                                                                                    |
| P21*                                                            | M          | 17-19                          | 21                                | Fall                       | <i>nil</i>                                                                                                    |
| P22*                                                            | M          | 70-79                          | 6                                 | Fall                       | Apixaban, thyroxine                                                                                           |
| P23*                                                            | M          | 50-59                          | 103                               | RTA                        | Valproate, levetiracetam, clobazam, phenofibrate, rosuvastatin, B12                                           |

|      |   |       |     |                 |                                                                                                   |
|------|---|-------|-----|-----------------|---------------------------------------------------------------------------------------------------|
| P24  | M | 30-39 | 13  | Assault         | Vit D                                                                                             |
| P25  | M | 70-79 | 22  | Fall            | Levetiracetam, Lacosamide, rivaroxaban, aspirin, bisoprolol, atorvastatin, Vit D, Vit B12         |
| P26  | M | 40-49 | 105 | <i>nk</i>       | Tramadol, fluxetone, Fostair, carbocystine, fexofenadine, beclomethasone, montelukast, salbutamol |
| P27* | M | 40-49 | 81  | Fall            | Sertraline, melatonin                                                                             |
| P28* | M | 30-39 | 10  | RTA             | Co-dydramol, ocular lubricant, paracetamol, potassium bicarb + potassium chloride                 |
| P29* | F | 30-39 | 6   | Fall            | Amitriptylline                                                                                    |
| P30  | M | 30-39 | 64  | Assault         | Codeine PRN                                                                                       |
| P31* | F | 50-59 | 12  | RTA             | Amitriptylline                                                                                    |
| P32  | F | 50-59 | 26  | Fall            | Amitriptylline, propranolol, paracetamol, ramipril, amlodipine                                    |
| P33* | M | 30-39 | 38  | Assault         | Sertraline                                                                                        |
| P34* | M | 20-29 | 6   | RTA             | Over the counter "painkillers" PRN                                                                |
| P35  | M | 30-39 | 66  | RTC             | <i>Nil</i>                                                                                        |
| P36  | M | 50-59 | 299 | RTC             | Lamotrigine, oxybutynine                                                                          |
| P37  | M | 50-59 | 9   | Object hit head | <i>Nil</i>                                                                                        |
| P38  | F | 70-79 | 11  | RTC             | Quinine, aciclovir, pregabalin                                                                    |
| P39* | M | 17-19 | 8   | RTC             | <i>Nil</i>                                                                                        |

\*indicates participants who also answered the Subjective Rating of General Health Status question

| <b>(B) Prospective Symptom Assessment Cohort – non-TBI Controls</b> |            |                                |                                  |
|---------------------------------------------------------------------|------------|--------------------------------|----------------------------------|
| <b>ID</b>                                                           | <b>Sex</b> | <b>Age range at assessment</b> | <b>Medications</b>               |
| C1                                                                  | F          | 40-49                          | <i>Nil</i>                       |
| C2                                                                  | M          | 50-59                          | <i>Nil</i>                       |
| C3                                                                  | M          | 20-29                          | <i>Nil</i>                       |
| C4                                                                  | F          | 20-29                          | <i>Nil</i>                       |
| C5                                                                  | F          | 20-29                          | Sertraline                       |
| C6                                                                  | F          | 20-29                          | <i>Nil</i>                       |
| C7                                                                  | F          | 20-29                          | Combined oral contraceptive pill |

|     |   |       |                                                                        |
|-----|---|-------|------------------------------------------------------------------------|
| C8  | M | 20-29 | Duloxetine                                                             |
| C9  | M | 20-29 | <i>Nil</i>                                                             |
| C10 | F | 20-29 | Vitamin D, zinc, fish oil supplements                                  |
| C11 | F | 20-29 | <i>Nil</i>                                                             |
| C12 | M | 20-29 | Vitamin D                                                              |
| C13 | M | 20-29 | <i>Nil</i>                                                             |
| C14 | F | 30-39 | Combined oral contraceptive pill                                       |
| C15 | F | 30-39 | Iron supplements, multivitamins, Vitamin B                             |
| C16 | F | 30-39 | <i>Nil</i>                                                             |
| C17 | F | 30-39 | <i>Nil</i>                                                             |
| C18 | F | 30-39 | <i>Nil</i>                                                             |
| C19 | F | 30-39 | Combined oral contraceptive pill, Vitamin D, multivitamins, probiotics |
| C20 | M | 30-39 | <i>Nil</i>                                                             |
| C21 | M | 30-39 | <i>Nil</i>                                                             |
| C22 | M | 30-39 | <i>Nil</i>                                                             |
| C23 | M | 40-49 | Naproxen, Codeine                                                      |
| C24 | M | 40-49 | <i>Nil</i>                                                             |
| C25 | F | 40-49 | <i>Nil</i>                                                             |
| C26 | F | 40-49 | <i>Nil</i>                                                             |
| C27 | M | 40-49 | <i>Nil</i>                                                             |
| C28 | F | 50-59 | <i>Nil</i>                                                             |
| C29 | F | 50-59 | <i>Nil</i>                                                             |
| C30 | M | 50-59 | <i>Nil</i>                                                             |
| C31 | F | 30-39 | <i>Nil</i>                                                             |
| C32 | M | 50-59 | <i>Nil</i>                                                             |
| C33 | F | 50-59 | <i>Nil</i>                                                             |
| C34 | F | 50-59 | <i>Nil</i>                                                             |
| C35 | M | 60-69 | <i>Nil</i>                                                             |
| C36 | F | 60-69 | <i>Nil</i>                                                             |

|     |   |       |                          |
|-----|---|-------|--------------------------|
| C37 | F | 60-69 | <i>Nil</i>               |
| C38 | M | 60-69 | <i>Nil</i>               |
| C39 | M | 60-69 | <i>Nil</i>               |
| C40 | M | 60-69 | Multivitamins, Vitamin D |
| C41 | M | 40-49 | <i>Nil</i>               |
| C42 | M | 60-69 | <i>Nil</i>               |
| C43 | M | 60-69 | <i>Nil</i>               |
| C44 | M | 70-79 | <i>Nil</i>               |

| <b>(C) Retrospective Autonomic Function Testing Cohort</b> |            |                                                          |                                                               |                            |                                                                                                                                                  |                                                                                                  |
|------------------------------------------------------------|------------|----------------------------------------------------------|---------------------------------------------------------------|----------------------------|--------------------------------------------------------------------------------------------------------------------------------------------------|--------------------------------------------------------------------------------------------------|
| <b>ID</b>                                                  | <b>Sex</b> | <b>Age range at injury (time since injury in months)</b> | <b>Age range at assessment (length of symptoms in months)</b> | <b>Mechanism of injury</b> | <b>Symptoms leading to referral</b>                                                                                                              | <b>Medications (not stopped for testing)</b>                                                     |
| R1                                                         | F          | 30-39 (309)                                              | 60-69 (20)                                                    | Fall off bike              | Dizziness, presyncope, tinnitus, problems with focussing vision, episodic severe photosensitivity                                                | Salbutamol INH                                                                                   |
| R2                                                         | M          | 20-29 (416)                                              | 60-69 (47)                                                    | RTA                        | Unsteady, dizziness, "problems with vision", falls with LOC, nausea                                                                              | Carbamazepine, Levetiracetam, Pregabalin, Clopidogrel, Atorvastatin, Clobazam, Vitamin D         |
| R3                                                         | M          | 20-29 (20)                                               | 20-29 (17)                                                    | RTA                        | LOC episodes with tunnel vision, no seizure indicators                                                                                           | <i>Nil</i>                                                                                       |
| R4                                                         | F          | 20-29 (44)                                               | 30-39 (44)                                                    | RTA                        | Constipation, headaches, poor sleep, dizziness and lightheaded, urinary frequency and urgency, temperature dysregulation and flushes on wakening | Thyroxine, Venlafaxine, OCP, Ferrous Fumarate, Cholecalciferol, Rizatriptan, Laxido, Flunarizine |

|     |   |             |                          |           |                                                                                                                                                                  |                                                                                                                        |
|-----|---|-------------|--------------------------|-----------|------------------------------------------------------------------------------------------------------------------------------------------------------------------|------------------------------------------------------------------------------------------------------------------------|
| R5  | M | 30-39 (159) | 40-49 (105), 40-49 (127) | <i>nk</i> | Collapse with LOC on standing but not meals (thoroughly investigated for seizures), headaches                                                                    | Tramadol PRN, Ibuprofen PRN, codydramol PRN, paroxetine                                                                |
| R6  | F | 30-39 (123) | 40-49 (123)              | RTA       | Collapses, sometimes with headache after                                                                                                                         | <i>Nil</i>                                                                                                             |
| R7  | F | 50-59 (41)  | 50-59 (41)               | RTA       | Anhidrosis, pain and headache, frequent falls with occasional LOC, poor balance, nausea on standing, alternating constipation/ diarrhoea, poor short-term memory | <i>Nil</i>                                                                                                             |
| R8  | F | 10-19 (35)  | 20-29 (35)               | <i>nk</i> | Dizziness and lightheaded on standing, palpitations and chest pain, panic attacks - all worsened on standing/exertion, constipation                              | Omeprazole, gabapentin, paracetamol, mebeverine, Oramorph PRN                                                          |
| R9  | M | 10-19 (65)  | 20-29 (65)               | RTA       | Easy, and painful erections (urological investigations normal)                                                                                                   | <i>Nil</i>                                                                                                             |
| R10 | F | 10-19 (314) | 40-49 (38)               | RTA       | Hyperhidrosis, presyncope while standing, dizziness when hot and standing, dry mouth and eyes                                                                    | Amitripylline, cocodamol, gabapentin, omeprazole, ocybutynin, tramadol, venalfaxin                                     |
| R11 | M | 40-49 (46)  | 50-59 (46)               | RTA       | Cold hands and feet, increased IBS symptoms, dizziness (persisting though diminished after vestibular manoeuvres)                                                | Laxido                                                                                                                 |
| R12 | M | 20-29 (50)  | 30-39 (14)               | RTA       | Always cold, episode of sweating in hands and feet, dizziness when sitting                                                                                       | Quetiapine, clonazepam, fexofenadine, fluticasone, beclomethasone, valproate, Vit D, sildeafil, fluoxetine, salbutamol |
| R13 | M | 30-39 (137) | 40-49 (137)              | RTA       | Hyperhidrosis, nocturia, excessive thirst, constipation, dizziness and visual disturbance when standing, occasional posture-related palpitations                 | Codeine, lefopramine, beconase, valproate, symbicort INH, fluticasone INH, salbutamol INH, sodium valproate, ibuprofen |

|     |   |             |             |           |                                                                                                                                                            |                                                               |
|-----|---|-------------|-------------|-----------|------------------------------------------------------------------------------------------------------------------------------------------------------------|---------------------------------------------------------------|
| R14 | F | 40-49 (2)   | 40-49 (2)   | RTA       | Two episodes of collapse with LOC (with normal EEG and cardiac investigations)                                                                             | <i>Nil</i>                                                    |
| R15 | M | 30-39 (36)  | 39-39 (36)  | <i>nk</i> | Fatigue, anosmia/ ageusia, LOC with rapid recovery but possible seizure activity noted on two episodes, memory/ cognition deficits                         | <i>Nil</i>                                                    |
| R16 | M | 40-49 (33)  | 40-49 (33)  | Assault   | Constantly feeling cold, R leg has temperature sensory deficit                                                                                             | <i>Nil</i>                                                    |
| R17 | M | 30-39 (150) | 40-49 (150) | Fall      | Lightheaded on standing                                                                                                                                    | Paracetamol PRN                                               |
| R18 | M | 40-49 (194) | 50-59 (194) | RTA       | Erectile dysfunction, nocturia and some incontinence, postural lightheadedness, profuse exertional upper body sweating, falls with LOC and syncope markers | Carbamazepine, Clonidine (started for sweating), Calcichew D3 |

KEY : *nk* = not known, RTA = road traffic accident, EEG = electroencephalogram, LOC = loss of consciousness, INH = inhaler, PRN = as required medication. Note that age decades are given for anonymisation purposes.

<sup>1</sup> carried out in conjunction with autonomic tests due to symptoms
